# Supplementary material for: Blueberry phenolics are associated with cognitive enhancement in supplemented healthy older adults
Source: Royal Society of Chemistry journal article supplement (doi:10.1039/d0fo02125c), 2020-12-15
Supplement: d0fo02125c1.pdf [file d0fo02125c1.pdf]

**Table S1.** Phenolic composition of the blueberry powder used in the blueberry supplementation study.

| Phenolic compounds        | Blueberry powder<br>(mg/100 g of dry powder) |
|---------------------------|----------------------------------------------|
| 3-Chlorogenic acid        | 137.0                                        |
| cyanidin-3-arabinoside    | 28.2                                         |
| Cyanidin-3-galactoside    | 65.1                                         |
| Cyanidin-3-glucoside      | 60.9                                         |
| cyanidin-3-xyloside       | 1.5                                          |
| Delphinidin-3-arabinoside | 39.7                                         |
| Delphinidin-3-galactoside | 31.4                                         |
| Delphinidin-3-glucoside   | 26.3                                         |
| Delphinidin-3-xyloside    | 1.8                                          |
| Malvidin-3-arabinoside    | 59.5                                         |
| Malvidin-3-galactoside    | 71.4                                         |
| Malvidin-3-glucoside      | 44.0                                         |
| Malvidin-3-xyloside       | 2.3                                          |
| Peonidin-3-arabinoside    | 6.5                                          |
| Peonidin-3-galactoside    | 58.1                                         |
| Peonidin-3-glucoside      | 14.9                                         |
| Peonidin-3-xyloside       | 1.1                                          |
| Petunidin-3-arabinoside   | 26.2                                         |
| Petunidin-3-galactoside   | 43.2                                         |
| Petunidin-3-glucoside     | 30.3                                         |
| Petunidin-3-xyloside      | 1.9                                          |

Phenolic compounds were analyzed by Amandeep Sandhu at Institute for Food, Safety, and Health at Illinois Institute of Technology, Bedford Park, IL using liquid chromatography–mass spectrometry.<sup>1,2</sup> Reproduced from Rutledge et al.<sup>3</sup> with permission from the Royal Society of Chemistry.

1. B. Buendía, M. I. Gil, J. A. Tudela, A. L. Gady, J. J. Medina, C. Soria, J. M. López and F. A. Tomás-Barberán, HPLC-MS Analysis of Proanthocyanidin Oligomers and Other Phenolics in 15 Strawberry Cultivars, *J. Agric. Food Chem.*, 2010, **58**, 3916-3926.
2. I. Edirisinghe, K. Banaszewski, J. Cappozzo, K. Sandhya, C. L. Ellis, R. Tadapaneni, C. T. Kappagoda and B. M. Burton-Freeman, Strawberry anthocyanin and its association with postprandial inflammation and insulin, *Br. J. Nutr.*, 2011, **106**, 913-922.
3. G. A. Rutledge, D. R. Fisher, M. G. Miller, D. F. Bielinski and B. Shukitt-Hale, The effects of blueberry and strawberry serum metabolites on age-related oxidative and inflammatory signaling *in vitro*, *Food Funct.*, 2019, **10**, 7707-7713.
